# Supplementary material
Source: Springer Nature journal article supplement (https://www.springermedizin.de/resource/supplementary/12885_2007_769_MOESM4_ESM.pdf/9470276)

■ Fast DC    ■ Standard DC  
■ Fast DC mock    ■ Standard DC mock

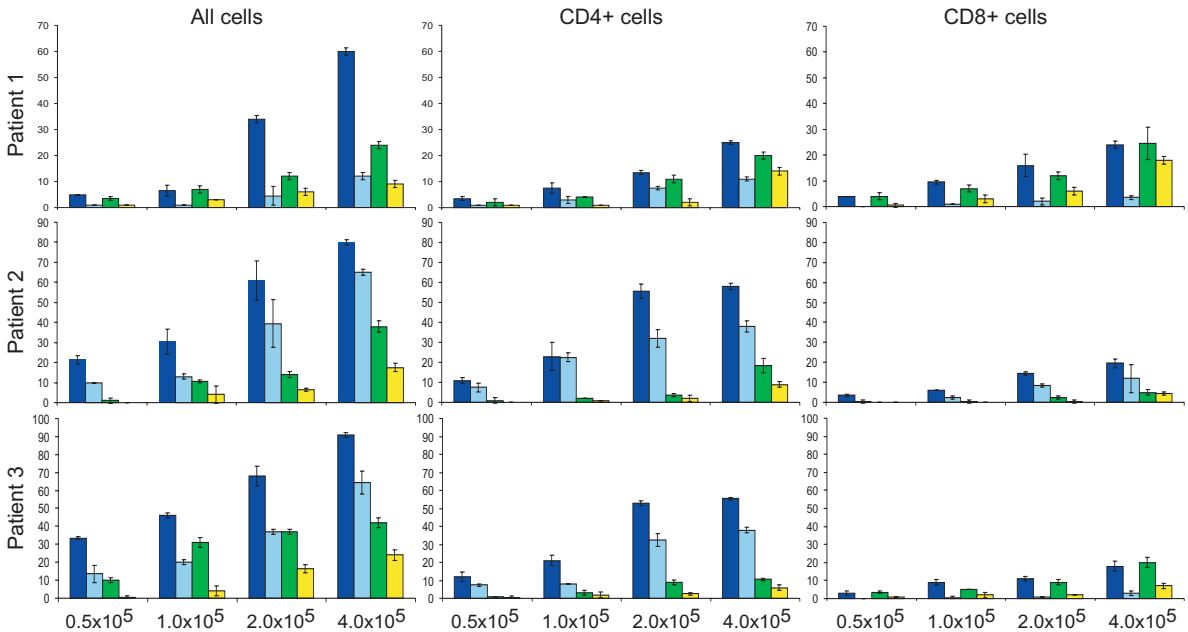

Supplement: MOESM4 [file 9470276]
